# Supplementary material
Source: PubMed Central journal article supplement (PMC2992293)
Supplement: supp_M110.168294_Supplemental_Material.pdf [file supp_M110.168294_Supplemental_Material.pdf]

**STRUCTURAL BASIS OF CARBOHYDRATE RECOGNITION BY CALRETICULIN**

**Guennadi Kozlov<sup>1</sup>, Cosmin L. Pocanschi<sup>2</sup>, Angelika Rosenauer<sup>1</sup>, Sara Bastos-Aristizabal<sup>1</sup>, Alexei Gorelik<sup>1</sup>, David B. Williams<sup>2</sup>, Kalle Gehring<sup>1</sup>**

From the <sup>1</sup>Department of Biochemistry, Groupe de recherche axé sur la structure des protéines, McGill University, 3649 Promenade Sir William Osler, Montréal, Québec, Canada H3G 0B1, and <sup>2</sup>Departments of Biochemistry and Immunology, University of Toronto, Ontario, Toronto M5S 1A8, Canada

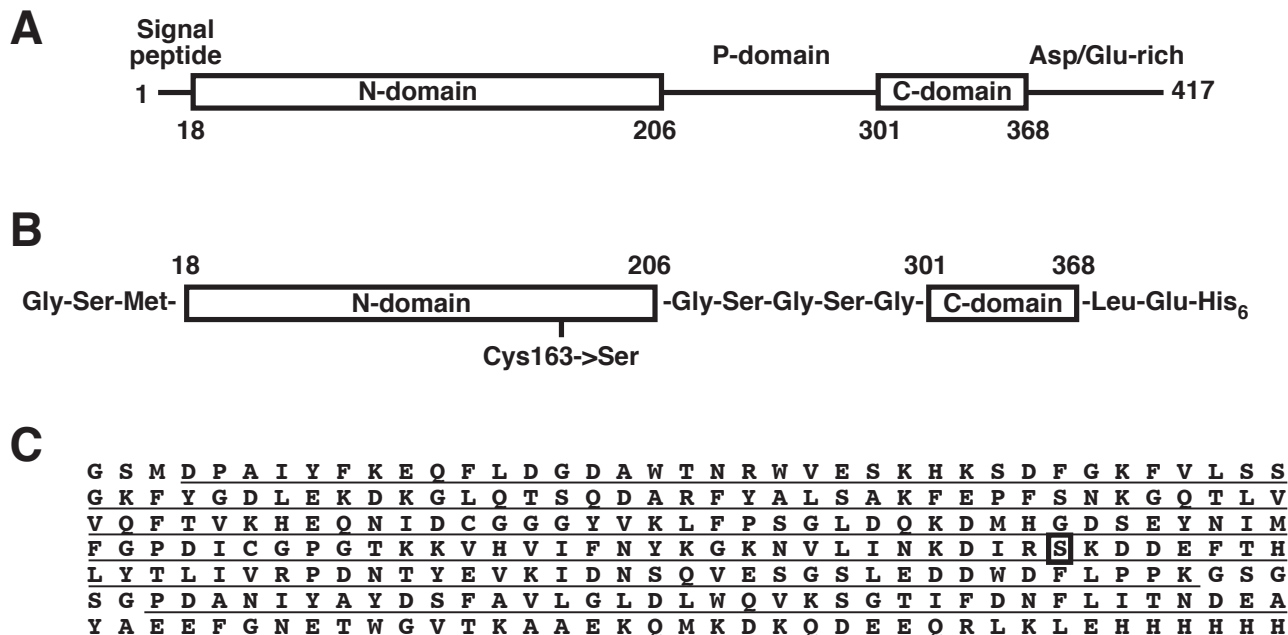

**Suppl. Figure 1.** Calreticulin lectin domain. (A) Schematic drawing of mouse calreticulin showing the signal peptide, two discontinuous segments of the lectin domain (N- and C-domains), P-domain and acidic C-terminus. (B) Schematic drawing and (C) amino acid sequence of the fragment crystallized. The N-, C- terminal extensions, C163S mutation, and five amino acid linker are indicated.

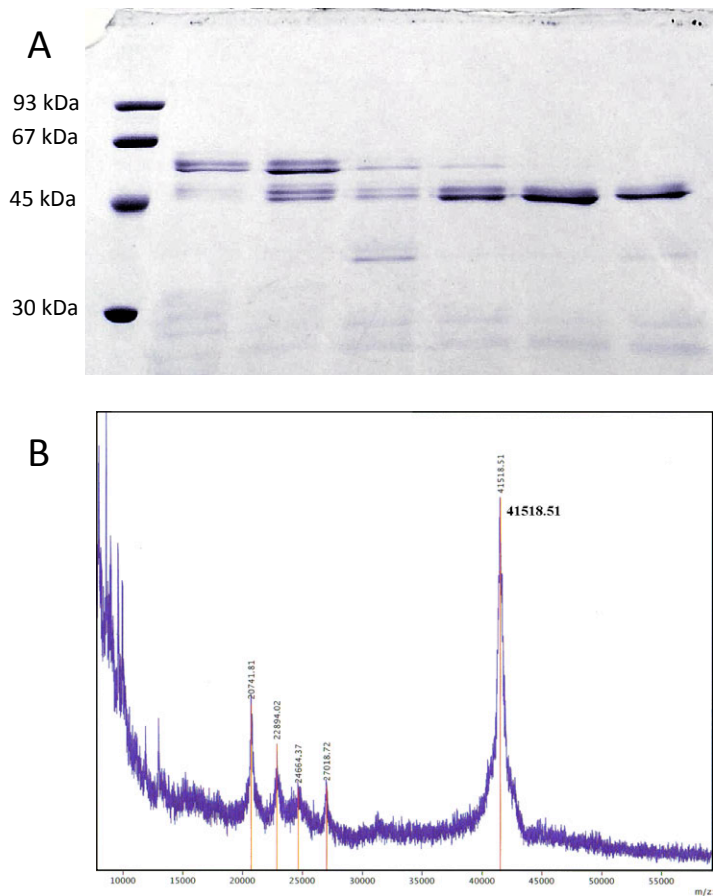

**Suppl. Figure 2.** Limited trypsin proteolysis of mouse calreticulin (CRT residues 18-416 with an N-terminal his-tag MGSSHHHHHSSGRENLYFQGHM and a C163S mutation). (A) SDS-PAGE. Lanes from left to right are molecular weight markers and digests with trypsin at 1/500 for 3 min, 15 min, 30 min, 1 h, 2 h, and 3 h. CRT migrates anomalously at higher molecular weight than expected. (B) MALDI-TOF mass spectrum of the main CRT tryptic fragments. The major product was at 41518 m/z, which is close to the theoretical mass for a fragment starting after the arginine in the tag and ending at K368.

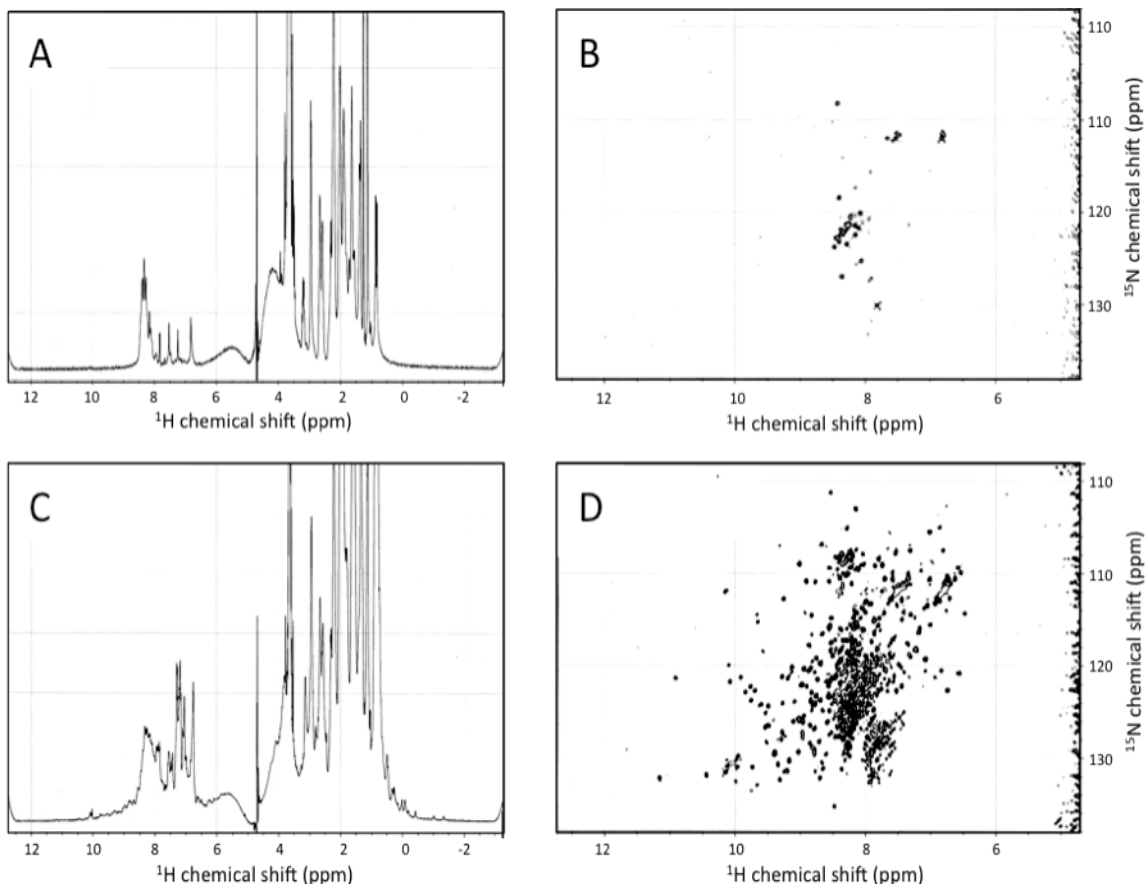

**Suppl. Figure 3.** NMR spectroscopy of C163S CRT (residues 18-206 and 301-416 with a GSGSG linker and N-terminal his-tag) before (A, B) and following tryptic digestion and partial purification (C, D). Left hand panels (A, C) are one-dimensional proton spectra. Right hand panels (B, D) are two-dimensional  $^1\text{H}$ - $^{15}\text{N}$  correlation spectra. Proteolysis was with 0.04 mg/ml trypsin for 3h, followed by size-exclusion chromatography on a Superdex 75 column (GE Healthcare).

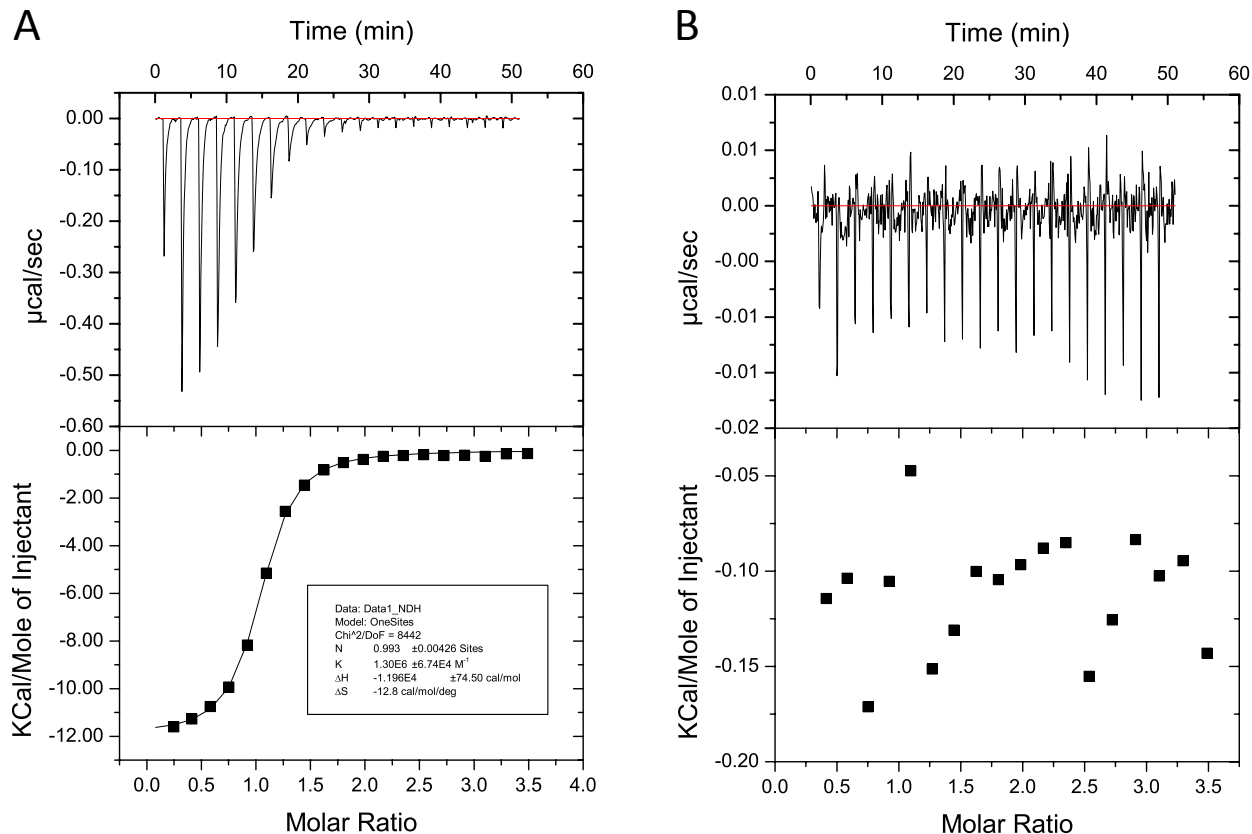

**Suppl. Figure 4.** Calorimetric titration of the C163S CRT lectin domain with Glc<sub>1</sub>Man<sub>3</sub> in the (A) absence and (B) presence of the reducing agent 10 mM TCEP (tris(2-carboxyethyl)phosphine). In each panel, the top graph shows the heat released following injections of Glc<sub>1</sub>Man<sub>3</sub> into a cell containing CRT lectin domain. The bottom graph shows the integrated heat after correction for the heat of dilution and normalization of the amount of Glc<sub>1</sub>Man<sub>3</sub> injected (squares). The curve represents the best fit to a model involving a single site. No binding could be detected in the presence of TCEP.

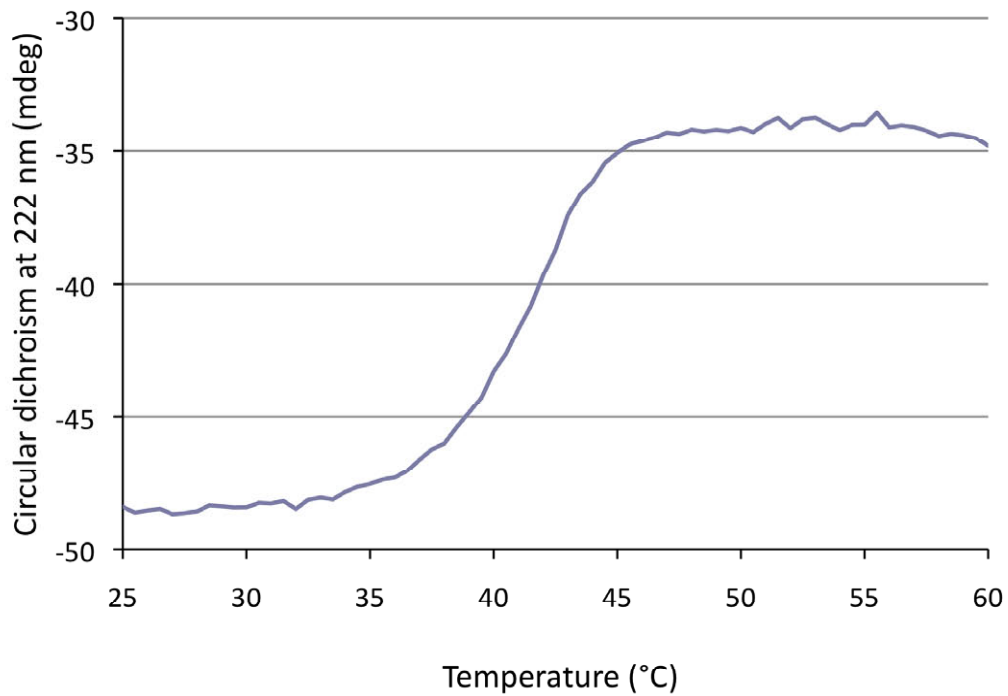

**Suppl. Figure 5.** Circular dichroism of the calreticulin lectin domain as a function of temperature. The C163S CRT lectin domain (0.4 mg/ml) in 20 mM HEPES, 150 mM NaCl, 1 mM CaCl<sub>2</sub>, pH 7.5 was heated at 1 °C minute and the dichroism measured at 222 nm in a 2 mm cuvette. The melting temperature is  $42 \pm 1$  °C.

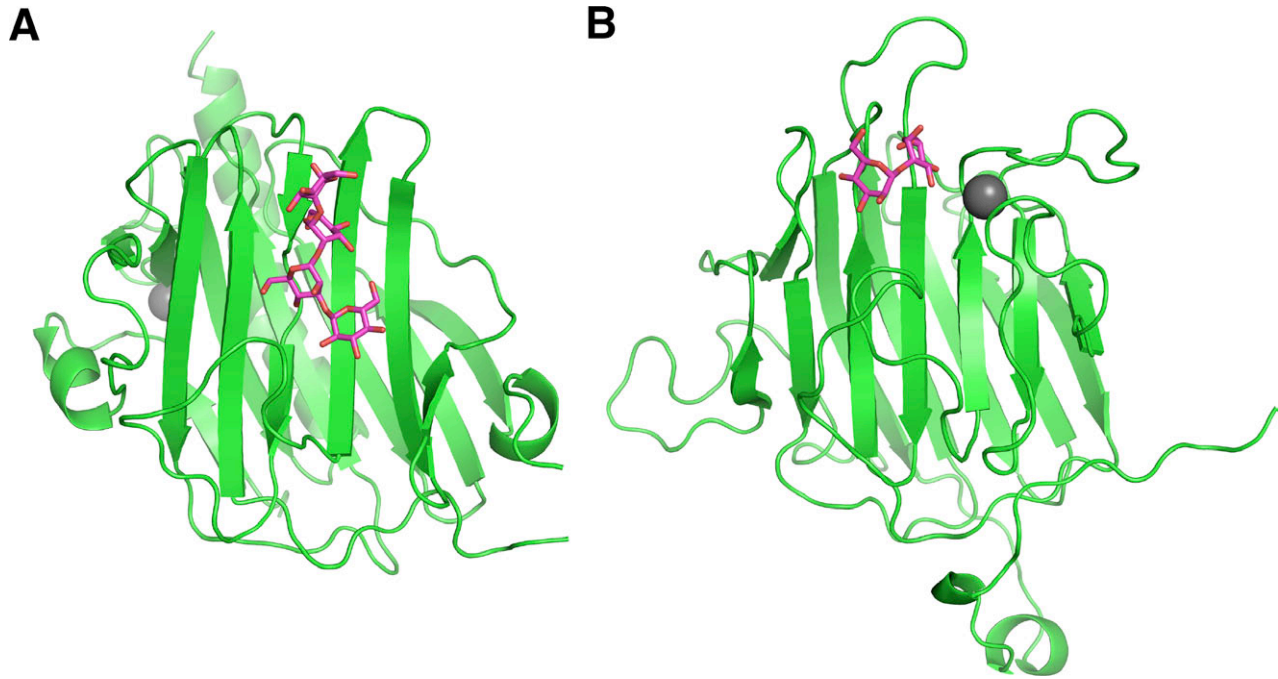

**Suppl. Figure 6.** CRT and VIP36 use different structural elements to bind oligosaccharides. (A) CRT uses the surface of the concave  $\beta$ -sheet to bind carbohydrates (magenta, stick representation). A calcium ion (grey ball) is positioned on the opposite side of the protein and does not participate in sugar binding. (B) VIP36 utilizes loops off the concave  $\beta$ -sheet to engage oligomannose and calcium is required for efficient protein-carbohydrate interactions.
